# Supplementary material for: Electrochemical performance of transition metal based CoB2O4 (B = Co and Fe) oxides as an electrode material for energy storage devices
Source: Royal Society of Chemistry journal article supplement (doi:10.1039/d2nj00392a), 2022-01-01
Supplement: d2nj00392a1.pdf [file d2nj00392a1.pdf]

## Electronic Supplementary Information (ESI)

### Electrochemical performance of transition metal based $\text{CoB}_2\text{O}_4$ (B = Co and Fe) oxides as an electrode material for energy storage devices

Megha Goyal<sup>a</sup>, Sahil Verma<sup>b</sup>, Jaideep Malik<sup>c</sup>, Prakash Giri<sup>d</sup>, Rajesh Kumar<sup>e</sup>, Anurag Gaur<sup>f,g\*</sup>

<sup>a</sup>Centre of Nanotechnology, Indian Institute of Technology Roorkee, Roorkee-247667, India

<sup>b</sup>School of Materials science and Nanotechnology, National Institute of Technology, Kurukshetra-136119, India

<sup>c</sup>Department of Chemistry, Indian Institute of Technology Roorkee, Roorkee-247667, India

<sup>d</sup>Department of Automobile and Mechanical Engineering, Tribhuvan University, Institute of Engineering, Paschimanchal campus, Pokhara-3370, Nepal

<sup>e</sup>University School of Basic and Applied Sciences, Guru Gobind Singh Indraprastha University, New Delhi-110078, India.

<sup>f</sup>Department of Physics, National Institute of Technology Kurukshetra, Kurukshetra-136119, India

<sup>g</sup>Department of Physics, J.C. Bose University of Science & Technology, YMCA, Faridabad-121006, India

\* Corresponding author: [anuragdph@gmail.com](mailto:anuragdph@gmail.com)

#### S1

The crystallite size  $d_{\text{XRD}}$  and the strain ( $\eta$ ) of the synthesized  $\text{Co}_3\text{O}_4$  and  $\text{CoFe}_2\text{O}_4$  are calculated by using Scherrer formula and Williamson-Hall (W-H) plot.

$$\text{Scherrer formula - } \beta = \beta_{\text{size}} + \beta_{\text{strain}} = \frac{1}{\cos \theta} \left( \frac{k\lambda}{\langle d_{\text{XRD}} \rangle} + 4 \eta \sin \theta \right)$$

Here  $\beta$  is FWHM of the diffraction peaks,  $k$  is the Scherrer constant (0.9),  $\lambda$  = wavelength of the incident x-rays,  $\eta$  = strain and  $\theta$  is the incident x-rays angle.

For crystallite size and strain calculation  $\beta \cos \theta / k\lambda$  versus  $4 \sin \theta / k\lambda$ , also known as W-H plot were plotted for both materials and linear curve fitting of the data points were performed to obtain the value of slope ( $m$ ) and intercept ( $c$ ). Here intercept ( $c$ ) provides the strain value, while by the help of slope crystallite size can be calculated by using below formula.

$$\text{For crystallite size calculation } \text{slope } (m) = \frac{k\lambda}{\langle d_{\text{XRD}} \rangle}$$

#### S2

##### Specific Capacitance/ Capacity at various Scan rates

For the calculation of Specific Capacitance/Capacity below formulas are used:

$$\text{Specific capacitance (Fg}^{-1}\text{)} = \frac{\int I dV}{2m * v (V_2 - V_1)}$$

$$\text{Specific Capacity (Cg}^{-1}\text{)} = \frac{\int I dV}{2m * v}$$

Where  $\int I dV$  represents area under the CV curve,  $m$  = mass of deposited active material,  $v$  = scan rate and  $V_2$  and  $V_1$  are maximum and minimum value of operating potentials.

### S3

#### Deconvolution of total capacity at different scan rates

$$I(V) = K_1v + K_2v^{1/2} \quad (1)$$

Here  $I(V)$  is the total current by capacitive and diffusion process at a particular scan rate,  $K_1$  and  $K_2$  are scan rate independent constants and  $v$  is representing the scan rate.  $K_1v$  represents the current contribution by capacitive process, while  $K_2v^{1/2}$  represents the current contribution by diffusion process. Equation (1) can also be written as

$$I(V)/v^{1/2} = K_1v^{1/2} + K_2 \quad (2)$$

So, by calculating the value of  $K_1$  and  $K_2$ , we can quantify the total current or capacity, separately in to capacitive current or capacitive capacity ( $C_{\text{outer}}$ ) and diffusion current or diffusion capacity ( $C_{\text{inner}}$ ).

### S4

#### Specific Capacitance/ Capacity at various Current densities

For the calculation of total discharge specific capacitance and capacity below formula are used

$$\text{Specific capacitance (Fg}^{-1}\text{)} = \frac{I \Delta t}{m \Delta V}$$

$$\text{Specific capacity (Cg}^{-1}\text{)} = \frac{I \Delta t}{m}$$

Where  $I$  = Current density,  $\Delta t$  = total discharge time,  $\Delta V$  = potential range and  $m$  = mass of deposited active material.

**Fig. S1**

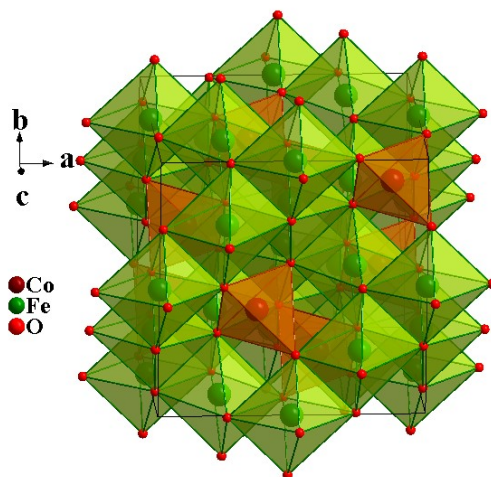

Fig. S1 Crystal structure of  $\text{CoFe}_2\text{O}_4$ .

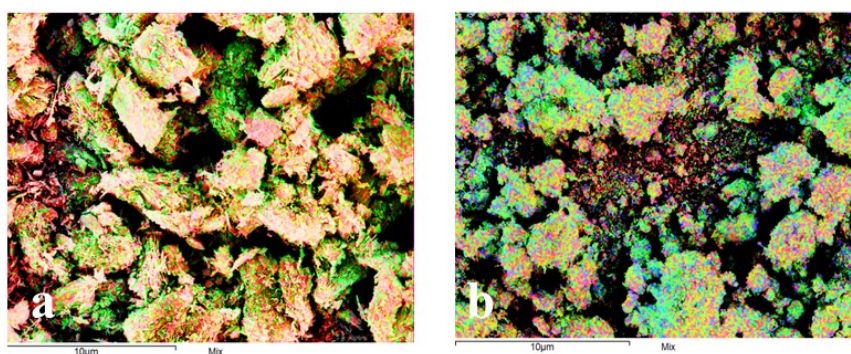

Fig. S2 FESEM Elemental mapping overlap of all elements (a)  $\text{Co}_3\text{O}_4$  (b)  $\text{CoFe}_2\text{O}_4$

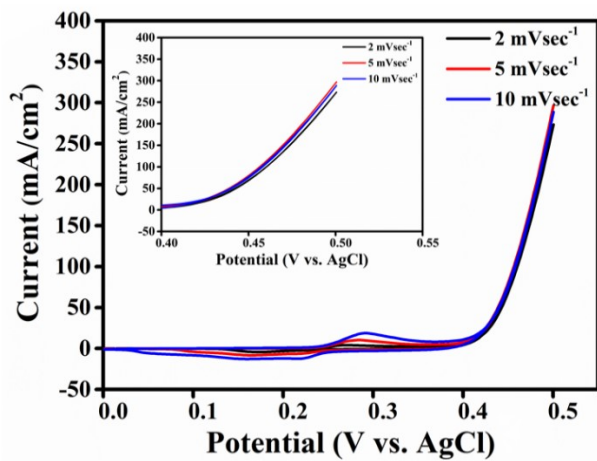

Fig. S3 CV analysis of  $\text{CoFe}_2\text{O}_4$  at potential range of 0 to 0.5 V.

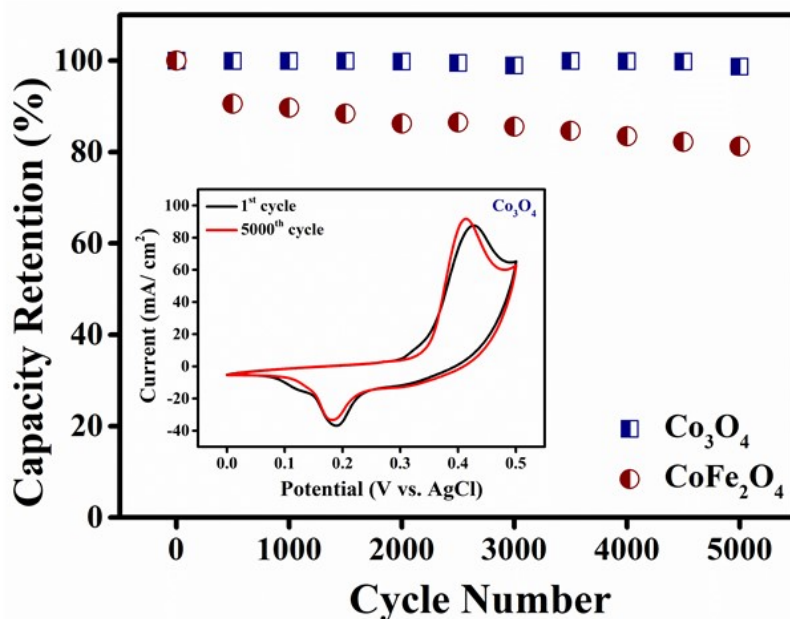

Fig. S4 CV cycling data over 5000 cycles at 100 mVsec<sup>-1</sup> scan rate.

Table.S1 Specific Capacitance/ Capacity at different scan rates ranges from 2mVsec<sup>-1</sup> to 50 mVsec<sup>-1</sup> for Co<sub>3</sub>O<sub>4</sub> and CoFe<sub>2</sub>O<sub>4</sub>.

| Specific capacitance/ Capacity at different scan rates |                                                                       |                                              |
|--------------------------------------------------------|-----------------------------------------------------------------------|----------------------------------------------|
| Scan rate (mVsec <sup>-1</sup> )                       | Specific Capacitance (Fg <sup>-1</sup> )/Capacity (Cg <sup>-1</sup> ) |                                              |
|                                                        | Co <sub>3</sub> O <sub>4</sub>                                        | CoFe <sub>2</sub> O <sub>4</sub>             |
| 2                                                      | 1039 Fg <sup>-1</sup> (415 Cg <sup>-1</sup> )                         | 527 Fg <sup>-1</sup> (169 Cg <sup>-1</sup> ) |
| 5                                                      | 938 Fg <sup>-1</sup> (375 Cg <sup>-1</sup> )                          | 482 Fg <sup>-1</sup> (154 Cg <sup>-1</sup> ) |
| 10                                                     | 723 Fg <sup>-1</sup> (289 Cg <sup>-1</sup> )                          | 472 Fg <sup>-1</sup> (151 Cg <sup>-1</sup> ) |
| 30                                                     | 470 Fg <sup>-1</sup> (188 Cg <sup>-1</sup> )                          | 428 Fg <sup>-1</sup> (137 Cg <sup>-1</sup> ) |
| 40                                                     | 393 Fg <sup>-1</sup> (157 Cg <sup>-1</sup> )                          | 401 Fg <sup>-1</sup> (128 Cg <sup>-1</sup> ) |
| 50                                                     | 357 Fg <sup>-1</sup> (143 Cg <sup>-1</sup> )                          | 380 Fg <sup>-1</sup> (121 Cg <sup>-1</sup> ) |

Table.S2 Specific Capacitance/ Capacity at different current densities ranges from 0.6 Ag<sup>-1</sup> to 12.5 Ag<sup>-1</sup> for Co<sub>3</sub>O<sub>4</sub> and CoFe<sub>2</sub>O<sub>4</sub>.

| Specific capacitance/ Capacity at different current densities |                                                                       |                                              |
|---------------------------------------------------------------|-----------------------------------------------------------------------|----------------------------------------------|
| Current density (Ag <sup>-1</sup> )                           | Specific Capacitance (Fg <sup>-1</sup> )/Capacity (Cg <sup>-1</sup> ) |                                              |
|                                                               | Co <sub>3</sub> O <sub>4</sub>                                        | CoFe <sub>2</sub> O <sub>4</sub>             |
| 0.6                                                           | 663 Fg <sup>-1</sup> (265 Cg <sup>-1</sup> )                          | 526 Fg <sup>-1</sup> (168 Cg <sup>-1</sup> ) |
| 1.2                                                           | 656 Fg <sup>-1</sup> (263 Cg <sup>-1</sup> )                          | 496 Fg <sup>-1</sup> (159 Cg <sup>-1</sup> ) |

|      |                                              |                                              |
|------|----------------------------------------------|----------------------------------------------|
| 2.5  | 615 Fg <sup>-1</sup> (246 Cg <sup>-1</sup> ) | 457 Fg <sup>-1</sup> (146 Cg <sup>-1</sup> ) |
| 6.2  | 406 Fg <sup>-1</sup> (162 Cg <sup>-1</sup> ) | 256 Fg <sup>-1</sup> (82 Cg <sup>-1</sup> )  |
| 12.5 | 232 Fg <sup>-1</sup> (93 Cg <sup>-1</sup> )  | 206 Fg <sup>-1</sup> (66 Cg <sup>-1</sup> )  |

**Table S3** Equivalent circuit fitting Parameters for Co<sub>3</sub>O<sub>4</sub> and CoFe<sub>2</sub>O<sub>4</sub>

| Element         | Parameter                   | Co <sub>3</sub> O <sub>4</sub> | Estimated Error (±) | CoFe <sub>2</sub> O <sub>4</sub> | Estimated Error (±) |
|-----------------|-----------------------------|--------------------------------|---------------------|----------------------------------|---------------------|
| R <sub>s</sub>  | R (Ω)                       | 1.2                            | 0.03                | 1.6                              | 0.01                |
| R <sub>ct</sub> | R (Ω)                       | 45                             | 2.28                | 65                               | 3.41                |
| C               | C (mF)                      | 27.8                           | 0.24                | 21.8                             | 0.12                |
| CPE             | Y0 (mΩ sec) <sup>-1</sup>   | 7.39                           | 0.73                | 2.75                             | 1.61                |
| Z <sub>w</sub>  | Y0 (mΩ sec) <sup>-1/2</sup> | 107                            | 0.26                | 15.7                             | 0.43                |

**R<sub>s</sub>**= Solution resistance (electrolyte, separator, and electrodes).

**R<sub>ct</sub>**= Charge transfer resistance.

**C**= Double layer capacitance.

**CPE**= Constant Phase Element.

**Z<sub>w</sub>**: Warburg impedance due to diffusional effects.
